# Supplementary material
Source: publisher figshare collection journal article supplement (https://acs.figshare.com/ndownloader/files/16718954)
Supplement: Supplementary file 1 [file 16718954]

# **Effect of thermal annealing treatment and defect analysis on AgGaGeS<sub>4</sub> single crystal**

Wei Huang, Zhiyu He\*, Beijun Zhao, Shifu Zhu, Baojun Chen, Ying Wu  
*College of Materials Science and Engineering, Sichuan University, Chengdu  
610064, China*

Corresponding author. Fax: +86 28 85412745.

E-mail address: hzyscu@163.com

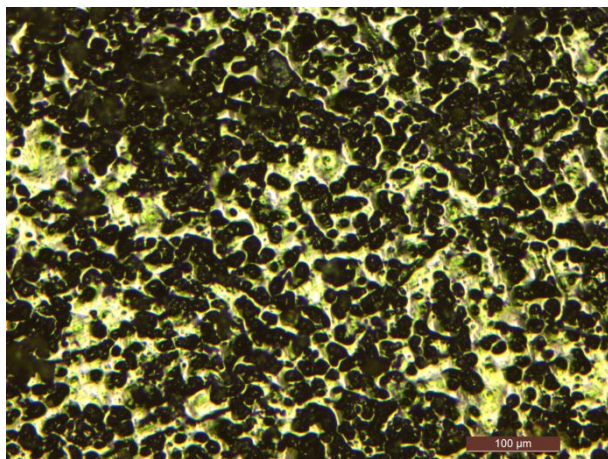

Figure S1. Metallographic microscope photographs of AgGaGeS<sub>4</sub> wafer surface after annealing  
with polycrystalline powder at 600 °C

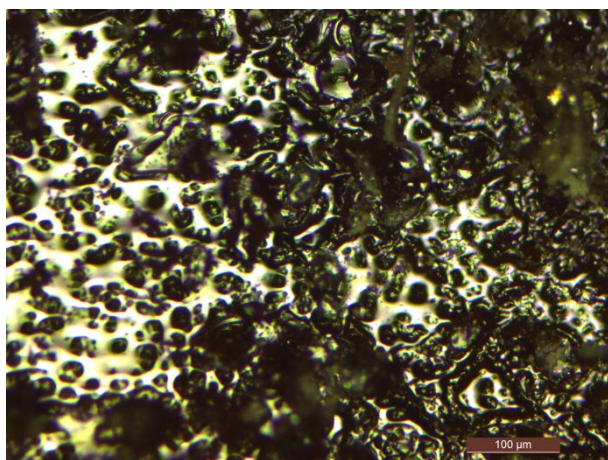

Figure S2. Metallographic microscope photographs of AgGaGeS<sub>4</sub> wafer surface after annealing  
with polycrystalline powder at 650 °C

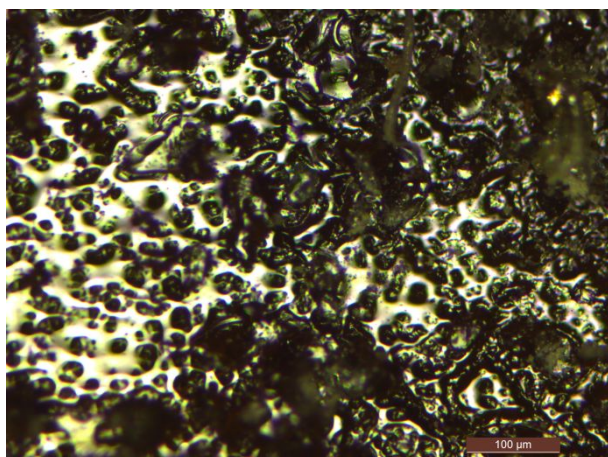

Figure S3. Metallographic microscope photographs of AgGaGeS<sub>4</sub> wafer surface after annealing with polycrystalline powder at 700 °C

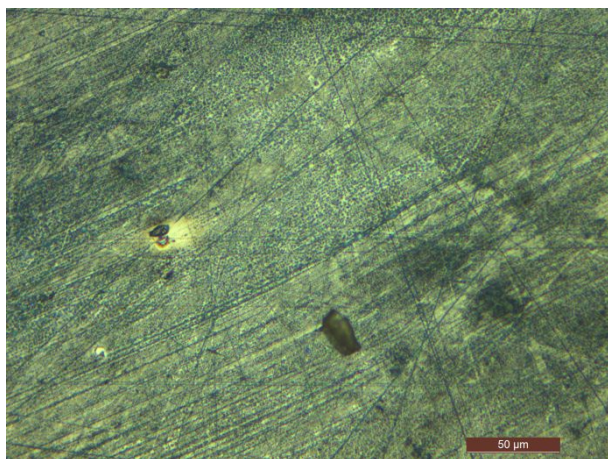

Figure S4. Metallographic microscope photographs of AgGaGeS<sub>4</sub> wafer surface after annealing in vacuum at 500 °C

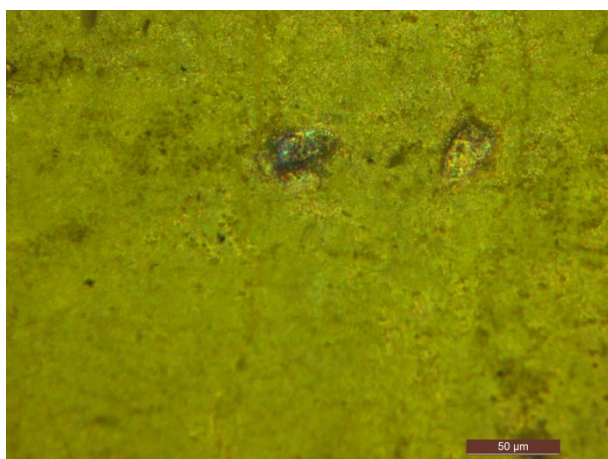

Figure S5. Metallographic microscope photographs of AgGaGeS<sub>4</sub> wafer surface after annealing in vacuum at 600 °C (additional experiment)

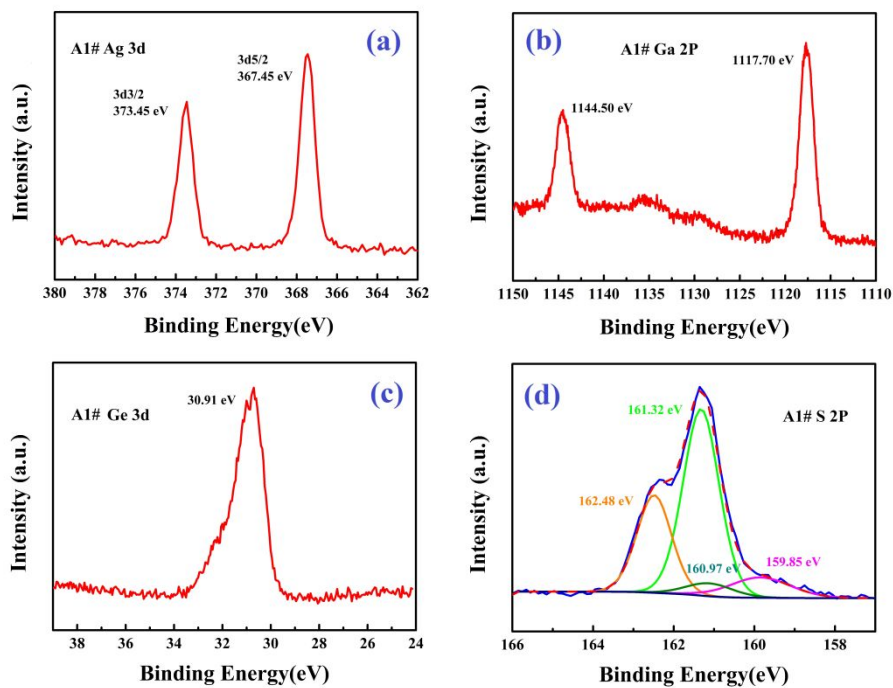

Figure S6. Detailed XPS recorded for polished surfaces of the A1# AgGaGeS<sub>4</sub> single crystals (a) Ag 3d; (b) Ga 2p; (c) Ge 3d; (d) S 2p

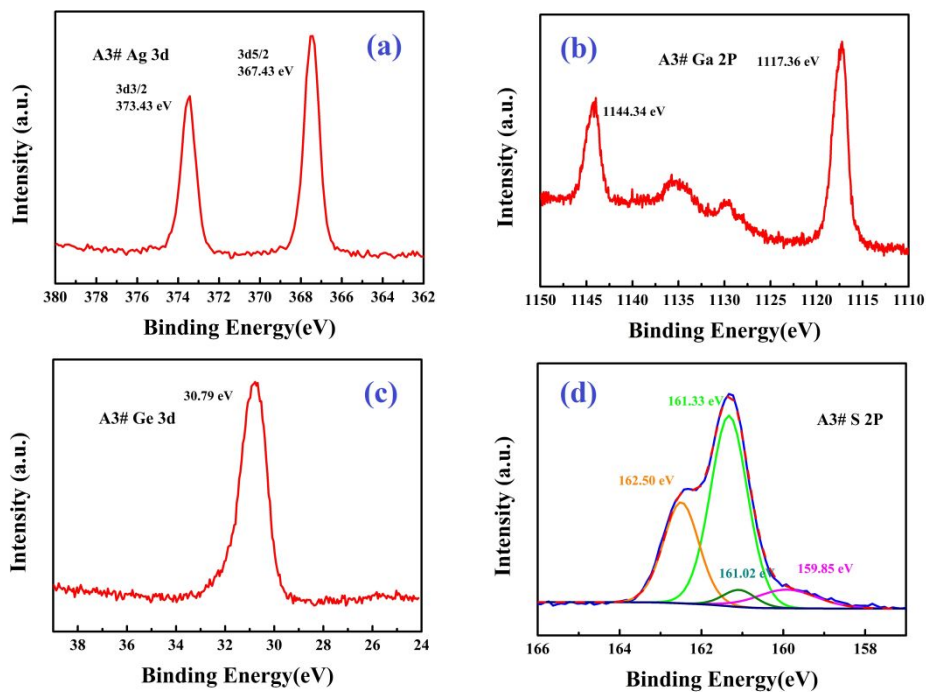

Figure S7. Detailed XPS recorded for polished surfaces of the A3# AgGaGeS<sub>4</sub> single crystals (a) Ag 3d; (b) Ga 2p; (c) Ge 3d; (d) S 2p



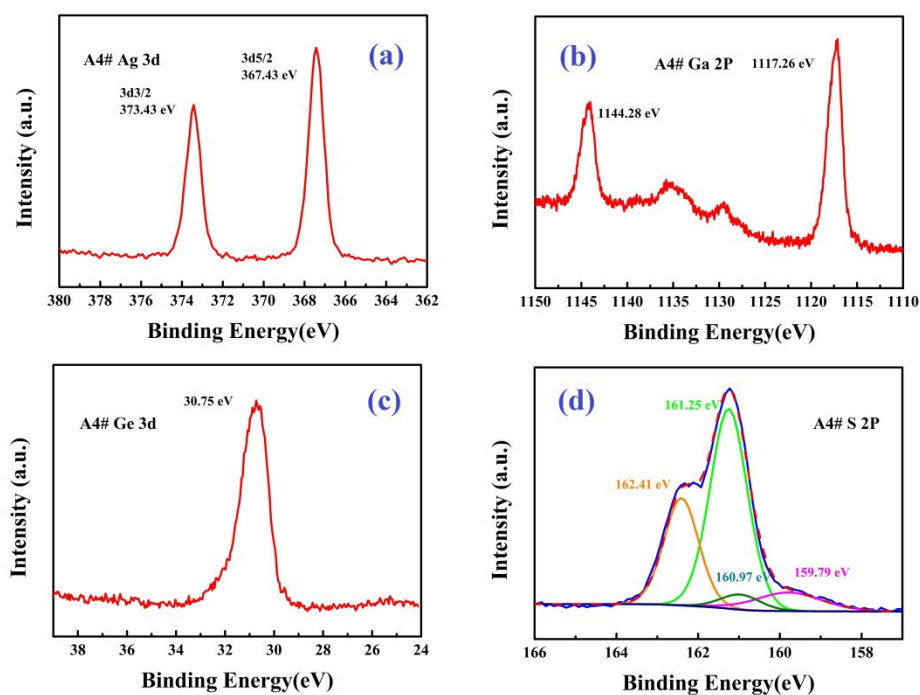

Figure S8. Detailed XPS recorded for polished surfaces of the A4# AgGaGeS<sub>4</sub> single crystals (a) Ag 3d; (b) Ga 2p; (c) Ge 3d; (d) S 2p

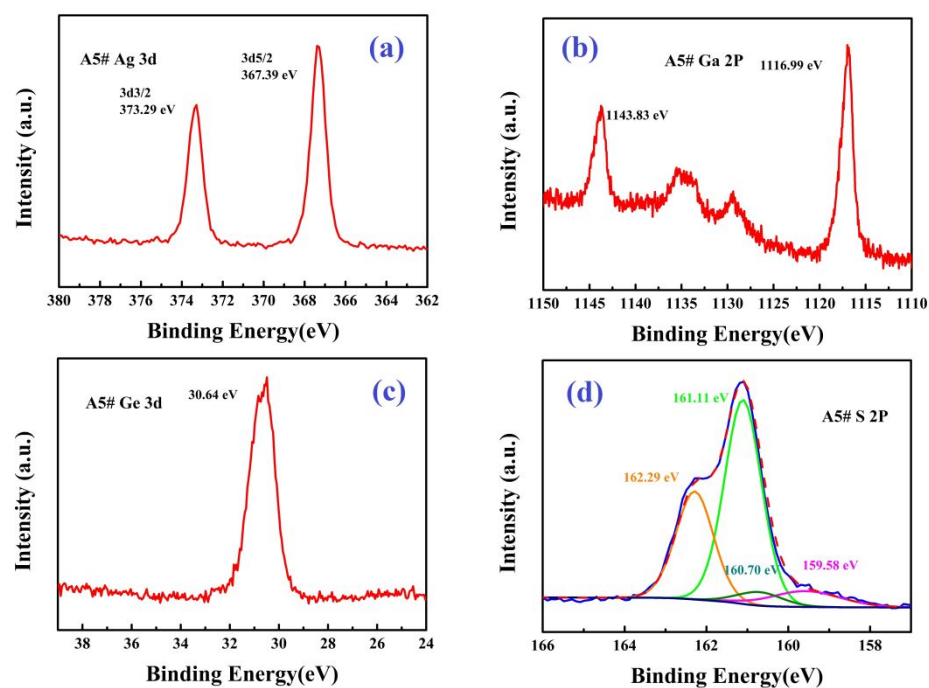

Figure S9. Detailed XPS recorded for polished surfaces of the A5# AgGaGeS<sub>4</sub> single crystals (a) Ag 3d; (b) Ga 2p; (c) Ge 3d; (d) S 2p

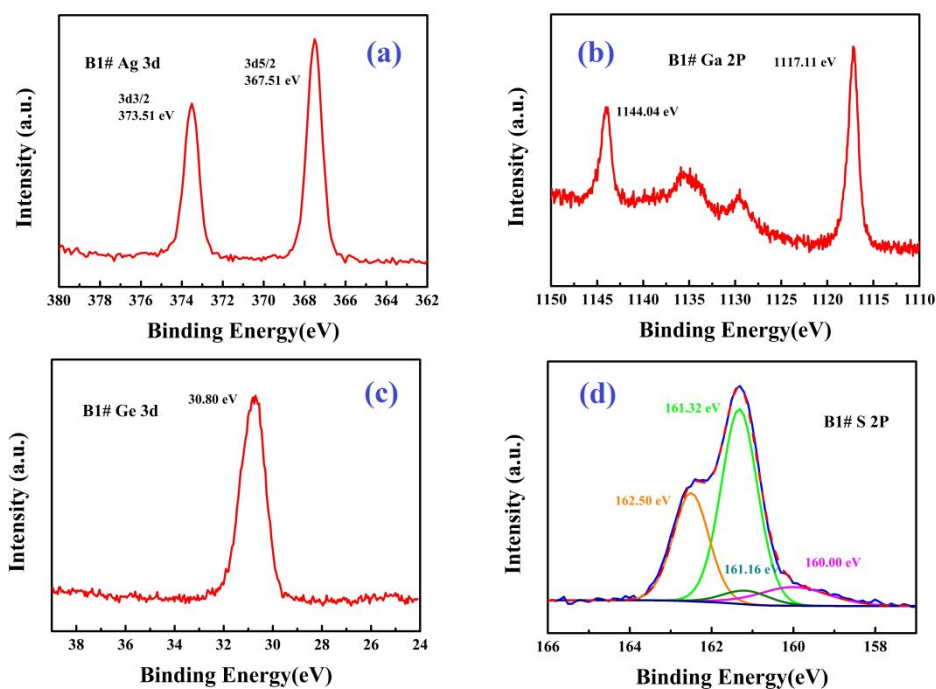

Figure S10. Detailed XPS recorded for polished surfaces of the B1# AgGaGeS<sub>4</sub> single crystals (a) Ag 3d; (b) Ga 2p; (c) Ge 3d; (d) S 2p

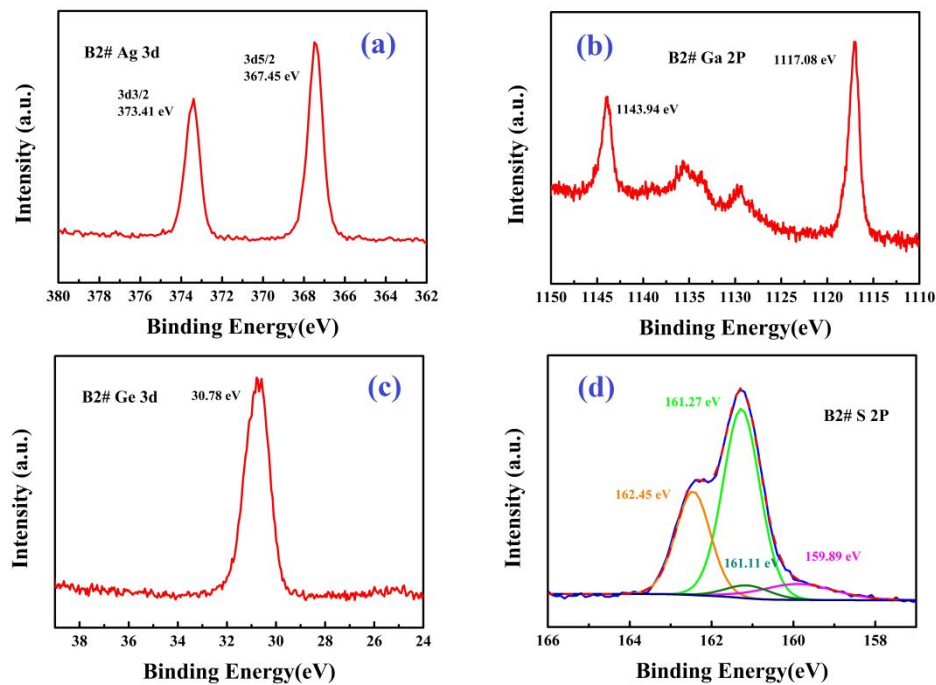

Figure S11. Detailed XPS recorded for polished surfaces of the B2# AgGaGeS<sub>4</sub> single crystals (a) Ag 3d; (b) Ga 2p; (c) Ge 3d; (d) S 2p

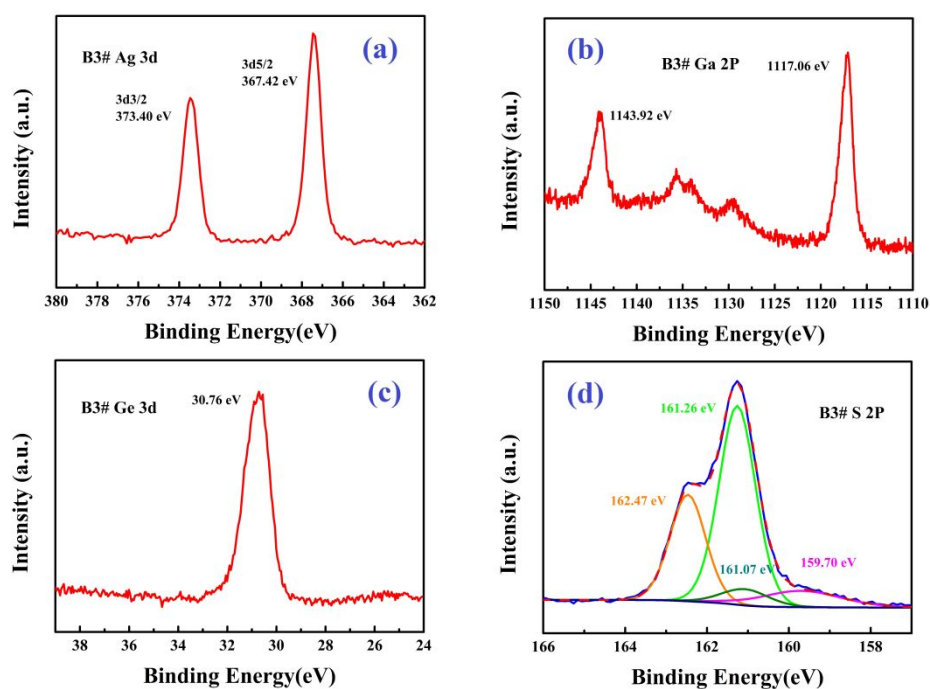

Figure S12. Detailed XPS recorded for polished surfaces of the B3# AgGaGeS<sub>4</sub> single crystals (a) Ag 3d; (b) Ga 2p; (c) Ge 3d; (d) S 2p

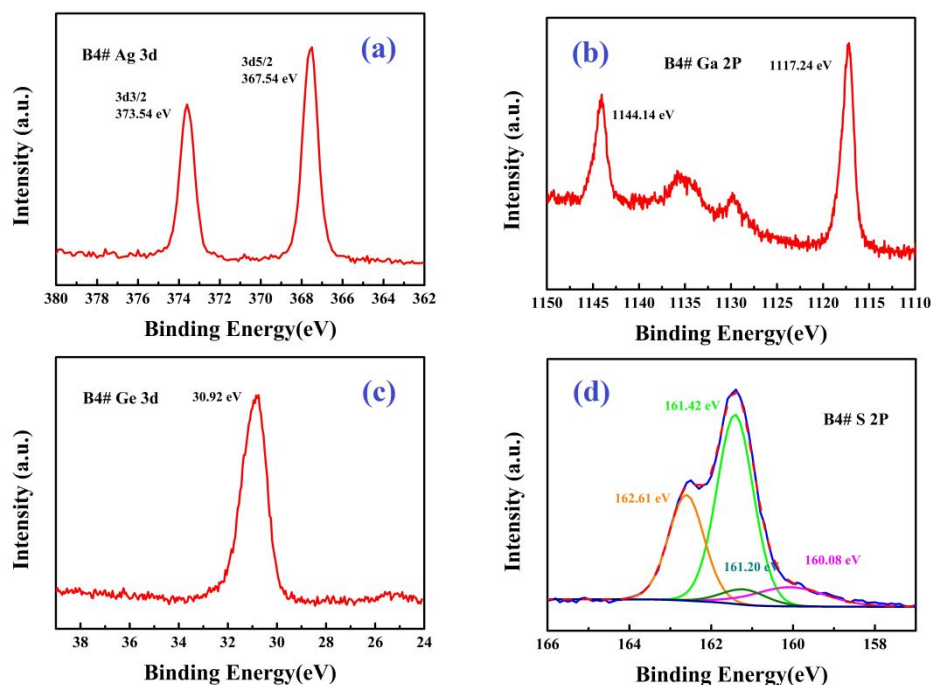

Figure S13. Detailed XPS recorded for polished surfaces of the B4# AgGaGeS<sub>4</sub> single crystals (a) Ag 3d; (b) Ga 2p; (c) Ge 3d; (d) S 2p

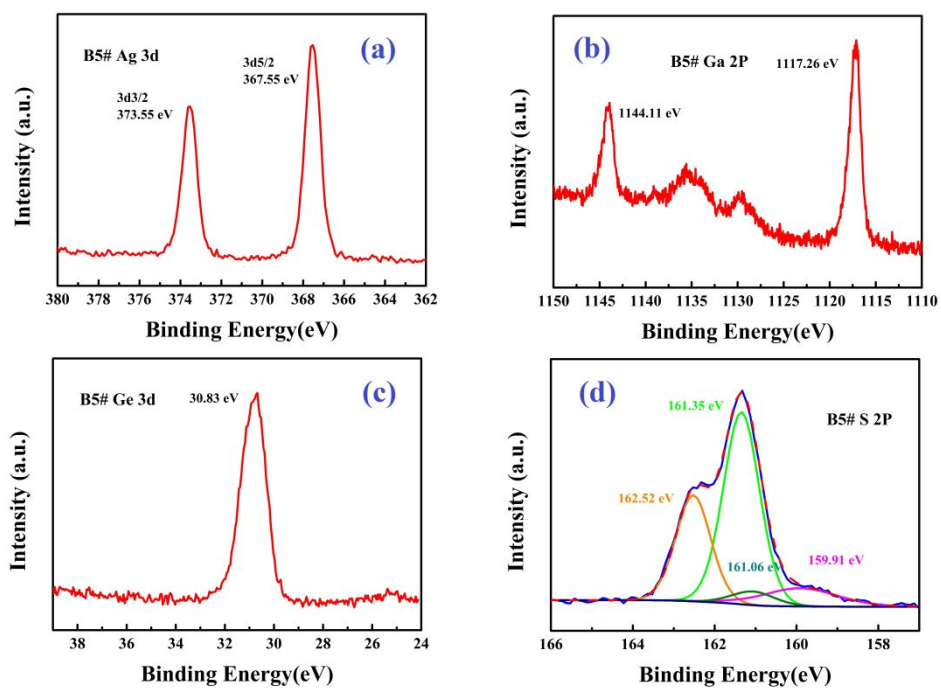

Figure S14. Detailed XPS recorded for polished surfaces of the B5# AgGaGeS<sub>4</sub> single crystals (a) Ag 3d; (b) Ga 2p; (c) Ge 3d; (d) S 2p
